# Supplementary material for: Lutein combined with EGCG improved retinitis pigmentosa against N-methyl-N nitrosourea-induced
Source: Royal Society of Chemistry journal article supplement (doi:10.1039/d3fo02716c), 2023-01-01
Supplement: d3fo02716c1.pdf [file d3fo02716c1.pdf]

Supplementary data

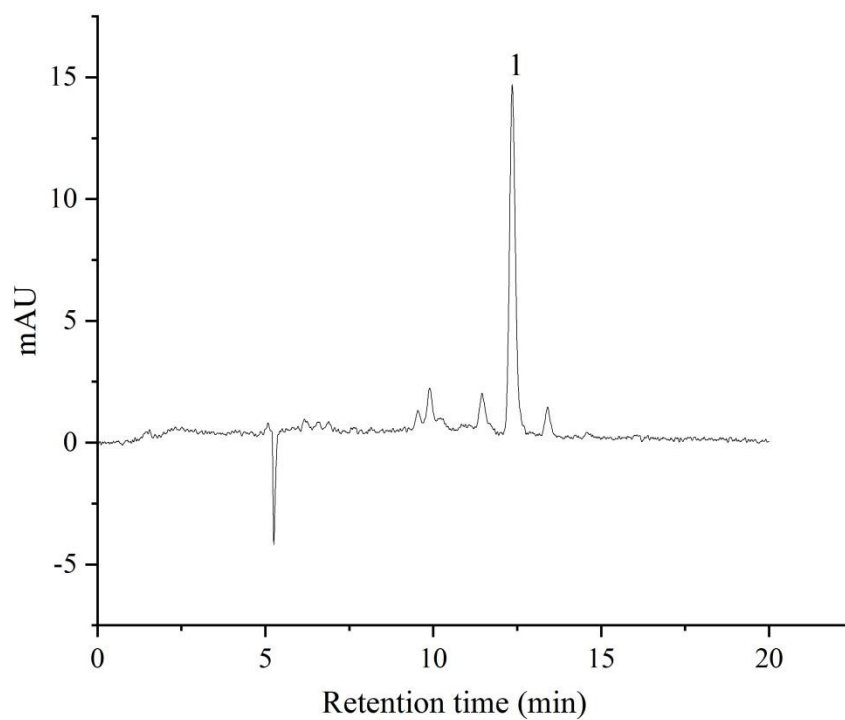

Fig S1. The HPLC chromatogram of lutein extraction from the liver. 1, lutein.

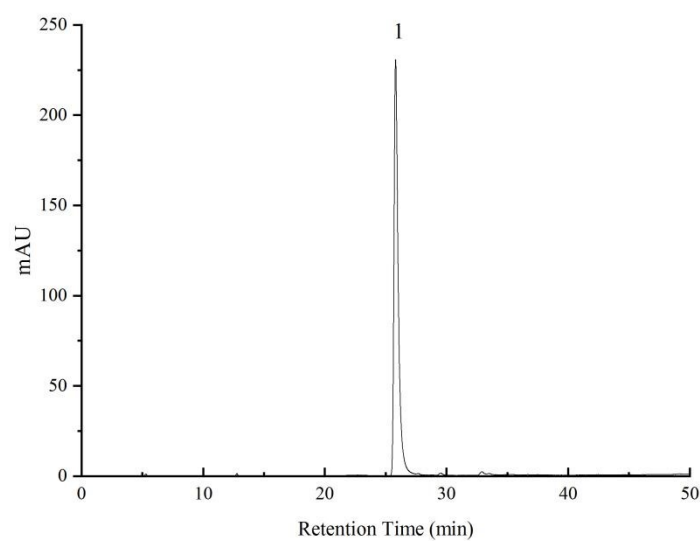

Fig S2. The HPLC chromatogram of epigallocatechin-3-gallate. 1, epigallocatechin-3-gallate.

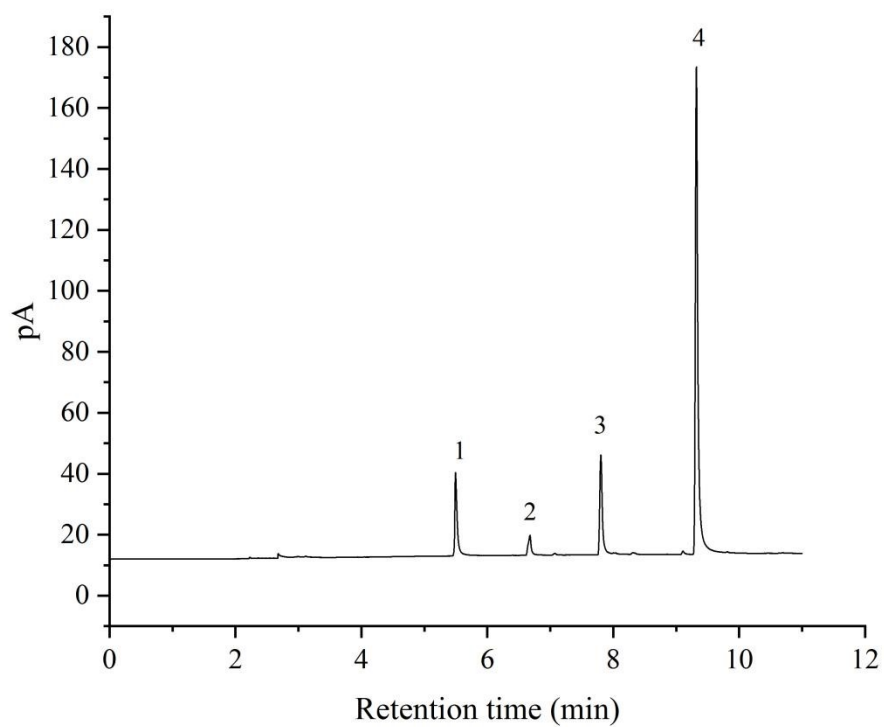

Fig S3. GC chromatography of SCFAs from mice cecal contents. 1, acetic acid; 2, propionic acid; 3, n-Butyric acid; 4, 2-ethylbutyric acid, internal standard.
